# Supplementary material for: Understanding the role of cities and citizen science in advancing sustainable development goals across Europe: insights from European research framework projects
Source: Frontiers journal article supplement (doi:10.3389/frsc.2023.1219768), 2023-10-18
Supplement: Table_1.XLS [file Table_1.XLS]

## Sheet: Synthesis review results
Project number	Project acronym	URL on CORDIS	Project website	Project period	Type of action	Project lead organization	Type of consoritum members	Project objective	Thematic topics forcused	Type of citizens involvement	Number of citizens involved or plan to be involved	Number of cities involved	Cities, regions & countries involved	Citizen engagement (contributory, collaborative, co-creation and collegiate)	Type of public engagement initiatives applied	Number of different public engagement initiatives implemented	Key approach, disciplinary, methods and technical innovation	Type of research activities	Key project outputs	End users and beneficiaries	Outcomes/potential impacts	Solutions/interventions	Scales for solutions/intenventions	Relevant SDGs	Project challenges (difficult to recuite participants, maintiaining participants, etc.)	Future research directions and soluitons, gaps to be addressed, lessons learned	Project keywords	Other key relevant projects
1	InSPIRES	https://cordis.europa.eu/project/id/741677	https://inspiresproject.com	2017-2021	RIA	ISGLOBAL, a research institute in Barcelona, Spain	Practitioners and experts from across and beyond Europe, including research institutions and civil society organizations (CSOs)	To connect social concerns and demands with researchers to co-create research projects with the potential to transform knowledge into action, reduce inequalities, and promote self-determination and a better society	Health sector, environmental and social determinants, e.g., a project in Hungary investigated how the use of trauma-informed yoga classes can benefit the well-being of various disadvantaged groups. In France, another project explored how urban planning decisions can lead to the gentrification of neighbourhoods.	Civil society and other stakeholders including vulnerable groups (women, the elderly, adolescents, migrants and refugees)	Not provided	No target cities mentioned	Bolivia, France, Hungary, Italy, the Netherlands, Spain and Tunisia	• The level of participation for each project was adapted according to civil society expectations and needs • co-construct knowledge together with the scientific and innovation actors	Science Cafés and other public engagement initiatives, community-based participatory research and innovation	123 science shops projects including 8 well established science shops, as well as having piloted the evaluation methodology and tool on 58 projects;	RRI, open science, impact evalutation	• 80 interviews to international experts were conducted • a systematic literature review on Science Shops was performed • An online ideation process was also performed in order to invite the entire community to reflect on what elements could be added to the Science Shops models • developed training materials to share with the community all the learning acquired • The eLearning course was develope…	• Online collaborative and crowdsourced database featuring science shops and citizen science initiatives • eLearning course containing six modules on Science Shops and participatory research • Monitoring and impact evaluation methodology and online tool which automatically create evaluation report and restitute through quantitative indicators and qualitative data showing the impacts of such multi…	Political bodies and decision makers, citizens, students, researchers, teaching staff, civil society members	• Give evidence and support political bodies and decision-makers, in order to propose changes in local, regional, national and international policies • Nurture the debate about the place and role of society in science, encouraging the systematic and ethical involvement of civil society actors and their societal concerns in the research and innovation processes • Support the development of new Res…	Ingenious science shops to promote participatory innovation, research and equity in science	Europe	Not particularlly addressed, but the projects results contribute to SDGs	None given	None given	Citizen-based science, science, citizen science, citizen scientists, co-create, science shop	TRAMS, PERARES, Living Knowledge
2	iSCAPE	https://cordis.europa.eu/project/id/689954	https://www.iscapeproject.eu	2016-2019	RIA	UCD, a public research university in Dublin, Ireland	Interdisciplinary team of experienced researchers, public authorities, business professionals, committed NGOs, members of regulatory authorities, citizens in Living Lab cities	To develop an integrated strategy for air pollution control in European cities that is grounded on evidence-based analysis	Air quality and climate change	Citizens and relevant stakeholders	Not provided	6	Bologna, Bottrop, Dublin, Guildford, Hasselt and Vantaa	Engagement of citizens that is fundamental in Living Lab activities to create value and increase public awareness of air pollution control	• Creating living lab mindset in Bologna and Dublin • Understanding the role of ‘sensors and citizens’ in Bottrop • ‘communicating the project’ and establishing more collaborative relationships with stakeholders in Guildford, Hasselt and Vantaa	30, delivered more than 30 citizen engagement activities, increasing citizen awareness and knowledge of air pollution and its impact for healthier cities. These included co-creation workshops, ideation and prototyping events, as well as feedback sessions.	Sensing technologies and monitoring kits	Air quality and meteorological simulations at various scales	• Scientifically-validated results and evidence-based data for stakeholders • Guidelines and policy recommendations • Advanced sensing technologies • New ideas and promising concepts • Increased collective awareness of air pollution and its impact on city life	Citizens, researchers, and public authorities	• Provide new insights into how traffic policy measures need to be designed to improve environmental quality • Smart Citizen Kits were used to increase the awareness of personal exposure to air pollution and are now commercially available • 40 peer-reviewed scientific publications • Project activities and results were featured in more than 100 online and broadcasting channels • Produced a number …	Low-boundary walls and hedges, such as Bologna (green infrastructure with focus on trees and photocatalytic coating), Bottrop (urban design and planning), Dublin (low-boundary walls), Guildford (green infrastructure with focus on hedges), Hasselt (behavioural interventions), and Vantaa (green infrastructure with focus on green roofs and walls).	The street, the neighbourhood and the urban scale	Not particularlly addressed, but the projects results contribute to SDGs 11 and 13	None given	None given	Living labs, air quality, passive control systems, citizens, monitoring kit	CLAiR-CITY, ICARUS
3	PLUS	https://cordis.europa.eu/project/id/822638	https://project-plus.eu	2019-2022	RIA	UNIBO, a research university in Bologna, Italy	Universities, research institutes, NGOs, SMEs	To address the main features of the platform (e.g., AirBnb, Deliveroo, Helpling and Uber) economy’s impact on work, welfare and social protection	Platforms (AirBnb, Deliveroo, Helping and Uber) impact on work, welfare and social protection	• Workers of the platform economies • Platform managers • City’s administrators • European policy makers • Unions. • Business companies. • Associations / Civil society / platform users • People at risk of social exclusion • Students • Doctors and psychologists specialized in work environment	Not provided	7	Barcelona, Berlin, Bologna, Lisbon, London, Paris, Tallinn	A bottom-up approach and techniques of co-creation to produce outputs directly impacting on policy-making, market and welfare	• Social Policy Labs to improve and optimize stakeholders’ involvement in project activities • Community of Practice focus on social protection issues related to platform economy and ways to ensure continuous social rights such as the individual activity account and possible ways of implementation at city-level.	Not provided	• Open Online Course (MOOC) to help workers and managers to better approach their job in terms of labour rights, welfare and fairness • A bottom-up approach and techniques of co-creation to produce outputs directly impacting on policymaking, market and welfare	• Interviews on the impact of platform economy at city level • A multi-disciplinary legal, socio-economic, political, historical approach in desk analysis • Field research (both qualitative and quantitative) • Action research (based on communities of practice, social laboratories and pilots-cases)	• 13 scientific publications • 4-6 members in CoP in each of the seven cities • A set of resources like policy briefings, reports, news, blog posts, etc. about the impact of platform economy in welfare and employment.	• Workers of the platform economies • Platform managers • City’s administrators • European policy makers • Unions. • Business companies. • Associations / Civil society / platform users • People at risk of social exclusion • Students • Doctors and psychologists specialized in work environment	Impacting on policy-making, market and welfare: innovative typologies of contracts, a Chart for digital workers' rights, taxation and regulation guidelines, social enterprise pilots and educational patterns for new skills	To foster new alternative scenarios that can contribute to promote social protection, economic development and well-being in digital labour	City	Not particularlly addressed, but the projects results contribute to SDGs 8 and 10	None given	None given	Urban spaces, Industry revolution, digitalization of labor, disruptive platforms	BEYOND4.0, TECHNEQUALITY
4	REFLOW	https://cordis.europa.eu/project/id/820937	https://reflowproject.eu	2019-2022	IA	CBS, is a public university situated in Copenhagen, Denmark	Interdisciplinary team of universities, research institutes, public authorities, SMEs, NGO, industries, etc.	1) To implement a common strategic vision of circular and regenerative cities by tailoring it to the different urban and peri-urban areas; 2) To create a set of digital sustainable tools to implement the vision of circular and regenerative cities; 3) To ensure replication and sustainability for the long-term governance transition of European cities towards CE.	• Textile life cycling • Wastewate heat • Food market • Fair tracker • Circular plastics • Plenergy	Citizens, SMEs, industries, policy makers	Not provided	6	Amsterdam, Berlin, Cluj-Napoca, Milan, Paris and Vejle	Co-creating circular and regenerative resource flows in cities	• Fab Labs and makerspaces as catalysers of a systemic change in urban and peri-urban environments • Awareness campaigns, public events, workshops	Not provided	• Blockchain technologies to incentivise the circular practices in local ecosystems • Data visualisation tools to enable continuous monitoring and optimisation of “urban metabolic” processes and rapid interventions management. • Networks of sensors, urban computing and geo-localisation to capture data ensuring accuracy, integrity and interoperability of relevant data infrastructures • Data visual…	Data and knowledge of circular and regenerative resource flows in 6 cities cross Europe	• App for efficient energy use • Digital tools for reusing wood materials • REFLOW OS: capable of running on major cloud providers and low-consumption embedded platforms. It has had its use cases and requirements defined, architecture designed, and the REFLOW Software Manual released. • Open Data Portal: it has been carried out, resulting in its deployment for internal use and initial sets of vis…	• Citizens • SMES • Industry partners • Policy makers • Other stakeholders	Enable the transition of European cities towards circular and regenerative practices	To create favourable conditions for the public and private sector to adopt CE practices	City	Not particularlly addressed, but the projects results contribute to SDGs 9, 11, 12	None given	None given	Circular economy, regerative city, knowledge hub,	CityLoops, Pop-Machina, CIRCuIT
5	SCORE	https://cordis.europa.eu/project/id/101003534	https://score-eu-project.eu	2021-2025	RIA	ITS, part of Atlantic Technological University, Sligo, Ireland	Academia, local authorities, RPOs, and SMEs	To design, develop, monitor and validate robust adaptation measures in coastal and low-lying areas to protect them from increasing climate and sea level risks, including coastal flooding and erosion, to enhance their overall long-term resilience.	Climate and sea level risks, including coastal flooding and erosion	Citizens, scientists, policy makers and other stakeholders	Not provided	10	Sligo and Dublin (Ireland), Oeiras (Portugal); Barcelona province/Vilanova i La Geltru, Benidorm, and Basque Country (Spain); Gdansk (Poland); Piran (Slovenia); Samsun (Turkey); MASSA (Italy)	Co-creation ecosystem-based approach	Coastal City Living Lab (CCLL)	Not provided	Ecosystem-based appraoches and sophisticated digital technologies	Coastal city living labs will be set up to address specific climate challenges, and their effectiveness will be assessed by different stakeholders through innovative monitoring systems and cutting-edge modelling approaches.	• Innovative platforms to promote business opportunities and financial sustainability of coastal cities • Prototype coastal city early-warning systems to enable smart, instant monitoring and control of climate resilience in European coastal cities	• Citizens • Scientists • policy makers • other stakeholders	Increase climate resilience, business opportunities and financial sustainability of coastal cities.	To rapidly, equitably and sustainably enhance coastal city climate resilience	City	Not particularlly addressed, but the projects results contribute to SDGs 3, 11, 13	None given	None given	Climate resilience, coastal city living labs, coastal cities	4C, CLINT, LANDMARC
6	SETA	https://cordis.europa.eu/project/id/688082	http://setamobility.eu	2016-2019	RIA	The University of Sheffield, a public research university in Sheffield, South Yorkshire, England	Diversified partners, Universities, SMEs, large company, public sectors (cities)	To create a technology and methodology able to use the wealth of mobility data to change the way mobility is organised, monitored and planned in large metropolitan areas	Mobility (Traffic congestion issues)	Citizens, business and decision makers, architecture	Not provided	3	Birmingham (UK), Turin(Italy), Santander(Spain)	Contributory/crowdsourcing	Participatory sensing and crowdsourcing	Explore user satisfaction with transport services	• Smart city concept • mobile technologies can monitor people’s mobility, and it has already released its apps to hundreds of thousands of citizens in England, and thousands in Spain. • technologies able to turn every street camera into the equivalent of a loop sensor – that is, a camera able to determine vehicle speed and count. • All data collected is then stored and brought together through de…	• Modelling of user satisfaction with transport services • Use of rule-based and machine learning techniques for traffic prediction • Review of the critical issues and potential solutions in the effective use of crowdsourced data • Use of activity monitoring data to generate both descriptive and predictive models of active travel behaviour • Use of simulated annealing techniques for vehicle routi…	• 15 journal papers covering the acquisition, fusion and modelling of mobility data • Citizen tracking technology • Video detection system • Large-scale data city models • Large-scale infrastructure • Methodologies for tracking car journeys	• Citizens • Businesses • Decision makers • Reserchers	• SETA’s technology has already been adopted by a major governmental customer in England. It has used it to track hundreds of thousands of citizens for health and wellbeing purposes (100,000 users in UK). • The technology has also been adopted by the Birmingham City Council to track its 8 000 free bikes. • Citizen tracking technology – is planning to create a spin-off company. Applications in hea…	Solution to manage high-volume, high-velocity, multi-dimensional, heterogeneous, cross-media, cross-sectoral data and information which is sensed, crowdsourced, acquired, linked, fused, and used to model mobility with a precision, granularity and dynamicity		Not particurlaly addressed, but the project outputs contribute to SDGs 3, 9, 11, 13	None given	None given	• Mobility • Sensors • Data • Transportation • neural networks	datACRON
7	ACTION	https://cordis.europa.eu/project/id/824603	https://actionproject.eu/toolkit	2019-2022	RIA	King's College London, a public research university located in London, England	Partner with researchers, policy makers, community groups, open data and open science activists, social enterprises and third-sector organisations	To transform the way we do citizen science (CS) today: from a mostly scientist-led process to a more participatory, inclusive, citizen-led one, which acknowledges the diversity of the CS landscape and of the challenges CS teams have to meet as their project evolves.	Pollution in general, including air, light, noise, wate, soil.	Peers and general public	Not provided	Worldwide	Worldwide for pilots on light pollution, soil pollution, waste reduction/management; air and soil pollution in Oslo and larger Oslo area (Norway), water pollution in netherlands, soil pollution in Esposende region (Portugal), noise pollution in Barcelona (Spain), air pollution in Rugeley & Staffordshire (England), soil pollution in Berlin (Germany),water pollution in South-West England, Water and…	Including one, two, three or four levels of engagement in various pilots (16 pilots in total)	• Define a research question (2 pilots) • Define a research question design (4 pilots) • Develop data gathering instruments (5 pilots) • Collect data (14 pilots) • Pre-process and curate data (5 pilots) • Analyse data (6 pilots) • Interpret data (6 pilots) • Share and communicate results (5 pilots) • Evaluate and assess impact (3 pilots)	Across all 16 initiatives, around 1 200 citizen volunteers took part, submitting almost 245 000 photographs and 7 600 audio files.	• Bootcamp concept – an intensive 6-month programme of interdisciplinary support popular with entrepreneurial or technology communities – to citizen science initiatives • Accelerator, a tailored programme developed by the project partners to provide each selected initiative with funding, training, mentorship and access to digital tools. • RRI principles, including open science	• literature reviews, surveys and interviews, to better understand engagement, motivation and incentives in citizen science • impact assessment framework and canvas to assess pilots impact	• Freely available citizen science toolkit to help academics design and realise citizen science projects that make the best use of available technologies. • Published nine academic papers on results • Attended a number of conferences and workshops • Engaged peers and the general public in a number of online and offline events	• Citizens • Policy makers • Reserchers	• 14 pilots have achieved social impact • 15 pilots have achieved scientific impact • 13 pilots have achieved political impact • 5 pilots have achieved economic impact	Toolkit to enable anyone to make their volunteer activities more participatory and sustainable	Local, city	Yes, mentioned SDGs in each of the 16 pilots. The project outputs contribute to SDGs 2, 3, 4, 5, 6, 10, 11, 12, 13, 14, 15	None given	• Policy masterclasses and recommendations to mainstream citizen science • Help citizen science become a more open, inclusive, citizen-led and sustainable endeavour. • More research work focused on using digital tools to scale up citizen science projects, and to train more citizen science teams	• Citizens • Bootcamp • Pollution • Light • Smartphone • astrophysicists	CitieS-Health, EnviroCitizen, CROWD4SDG, REINFORCE, CoAct, MICS, EU-Citizen.Science, WeCount,
8	AURORA	https://cordis.europa.eu/project/id/101036418	https://www.aurora-h2020.eu	2021-2025	IA	Polytechnic University of Madrid, a public university, located in Madrid, Spain	Parttner with universities, public sector, SME, research institutes	To empower several thousand citizens across five locations in Denmark, England, Portugal, Slovenia, and Spain to make more informed energy decisions	Energy, GHG emission	Citizens in general, particularly marginalised groups and young generations will be addressed	7000	5	• Aarhus University, Denmark • Évora University, Portugal • Forest of Dean District Council, United Kingdom • University of Ljubljana, Slovenia • Technical University of Madrid, Spain	Including all of these four levels of engagement, by By crowdfunding local energy communities and building ca. 1 megawatt in photovoltaic power, these citizens will become active ‘prosumers’ to transform the energy system at large, and democratise its governance	Citizen science hubs covering from civic innovation workshops to home-made low-cost sensors or community infrastructures fabrication, to environmental observation for creating civic local roadmaps, and to Citizens acting as ambassadors for sustainable energy behaviours	5	• Citizen science hubs, on the one hand, citizens will crowdfund a local solar photovoltaic facility in an inclusive system enabling low-cost shares from 20EUR. On the other hand, participants will monitor their individual energy mix demand behaviours, which together with their energy production in the facility, will generate accurate know-how on the carbon footprint related to their energy mix b…	It is an innovation action.	Not available yet.	• Citizens • Policy makers • Reserchers	• To generate the first generations of Near Zero-Emission Citizens acting as ambassadors for sustainable energy behaviours. • As a consequence of the activities performed by citizens, data collected AURORA will also be able to improve energy transition scenarios including citizens' behaviours and learning periods and generate reliable data on the impact of climate on energy infrastructures.	• Interventions to modify their energy behaviour towards a more climate-neutral impact while fostering energy-savings will imply the involvement of citizens in individual and collective actions	Local	No, not mentioned yet. The project activities have potential to contribute to SDG7, 11, 13	None given	None given	Energy, zero-emission, green deal	PSLifestyle
9	CitieS-Health	https://cordis.europa.eu/project/id/824484	https://citieshealth.eu	2019-2022	RIA	ISGLOBAL, a research institute in Barcelona, Spain	Universities, research institute, SME, NGO	To develop an effective citizen science model for urban environment and health	Air pollution, biomass burning, noise pollution, industrial pollution and urban design	Citizens in general	• In Barcelona, citizens helped to shape a study into how pollution can affect mental health. Some 300 citizens provided around 2 500 measurements of cognition and well-being on different days. These were then compared to air pollution concentrations that citizens had helped to monitor, using personal nitrogen dioxide collection tubes. • In Lucca, Italy, a survey of 1 025 residents in the Serchio…	5	Barcelona (Spain), Kaunas (Lithuania), Ljubljana (Slovenia), Amsterdam (Netherlands), Lucca (Italy)	All three levels of engagement, including defining research questions, designing and implementing studies, and analysing, interpreting and communicating results, and co-design a set of governance principles and procedures to allow participants control over project data and outcomes.	Workshops, meetings and carrying out surveys	Not provided	Environmental epidemiology, citizen sensing, open science, governance of science	• Defining the research questions • Designing scientifically robust experiments, in order to decide which type of data should be collected or generated and how it should be collected • Interpreting and disseminating the results of the project	An online interactive citizen science toolkit to help to engage with communities and tackle issues of common concern	Researchers, citizens, policy makers	• Scientific publications • Practical knowledge and tools that can help others designing similar environmental epidemiology studies that follow a citizen science approach • Policy-society dialogues to inform policy making and urban planning	Development and promotion of citizen science projects in urban environment and health	Local, city	No, not mentioned yet. The project activities have potential to contribute to SDG3, 11, 13	Citizen science has not been fully used to evaluate the link between environmental exposures and health	• Plan to publish a paper on lessons learned from CitieS-Health • Information gaps on urban environment and health	Urban, pollution, industrial, air, health, biomass, lifestyle	EnviroCitizen, CROWD4SDG, REINFORCE, EU-Citizen.Science, WeCount, ACTION, CoAct, MICS
10	CLEARING HOUSE	https://cordis.europa.eu/project/id/821242	https://clearinghouseproject.eu	2019-2023	RIA	The European Forest Institute, an international organization established by the European states, Joensuu, Finland.	Research institutes, NGO, universities, SMEs, public sectors	To analyse and develop – across China and Europe – the potential of NBS in general, and urban forest-nature-based solutions in particular, for enhancing the resilience of cities facing major ecological, socio-economic, and human wellbeing challenges.	Urban forests, urban ecosystem, human wellbeing	Citizens in general	Not provided	10	Five in Europe (Barcelona, Brussels, Gelsenkirchen, Halle-Leipzig, Krakow), and five in China (Beijing, Hangzhou, Hong Kong – Guangzhou – Shenzhen, Huaibei, and Xiamen)	Co-design	Co-design workshops	Not provided	Inter- and trans-disciplinary research approach, knowledge exchange and dissemination	• novel and bottom-up research agendas • interventions and co-creation of public policies • a review of the existing academic and practical knowledge • an exploratory analysis of the CLEARING HOUSE case studies. • governance, economic and institutional analyses	• A citizen science tool, a benchmarking tool, and a decision-support tool for assessing diverging urban forest – nature-bases solutions scenarios. • A targeted communication and dissemination approach, including guidelines for implementation and an education package, to increase impact and uptake by cities and its citizens.	Cities, city planners, decision-makers, business and civil society, citizens, schools	• Project tools will facilitate locally embedded research and planning that support urban forest implementation in cities and urban regions. • The project’s targeted communication and dissemination approach will increase impact and uptake by cities and its citizens, support the implementation of the urban greening targets in the European Green Deal.	Nature-based solutions	Cities and city regions	Not mentioned in particular, however the project outputs contribiton to SDGs 3, 11, 13	None given	None given	Collaborative learning, nabure-based solutions, sustainability, resilient cities, China, Europe	CONEXUS, REGREEN, INTERLACE
11	CompAir	https://cordis.europa.eu/project/id/101036563	https://www.wecompair.eu	2021-2024	IA	Flemish Region/Vlaams Gewest, Government Agency from Belgium, Brussel.	Universities, research institute, public sectors, NGOs, SMEs	To increase citizens' capacity to monitor, understand and change their environmental impact.	Air quality	Citizens, focus on women, young people and hard-to-reach groups, business and city administration participants	Not provided	5	Athens (Greece), Berlin (Germany), Flanders (Belgium) and Sofia & Plovdiv (Bulgaria)	Co-design/co-creation process of local environmental problem definition, experiment design, data collection, analysis, solutioning and change.	Citizen science lab/face-to-face meetings and workshops	Not provided	Collective approach to evidence gathering that fills gaps in existing data sources, and provides new routes to innovation	It is a innovation action.	Not available yet.	Citizens, cities, business, researchers	• Citizens More Aware of Individual Actions and Behaviours • City Decision and Policy Makers Able to Act on Real Evidence • Businesses Able to Adopt Greener Processes in the Community • Researchers Gain New Data Sources and Analysis Capabilities	Raising awareness of air quality.	Cities and regions	Yes, project results including data can contribute to SDG 13 on wider knolwege sharing and action adoption	None given	None given.	Community observation, air quality, citizen science	SOCIO-BEE
12	COS4CLOUD	https://cordis.europa.eu/project/id/863463	https://cos4cloud-eosc.eu	2019-2023	RIA	The Spanish National Research Council, a public research institution, Madrid, Spain	Research centres, companies and organizations	To design, prototyped and implemented services that address the Open Science challenges shared by Citizen observatories of biodiversity	Biodiversity, environmental monitoring (air, water, odor)	Traditional and citizen scientists	• 176 people attending co-design events • 38 persons joined the project community • 35% of the project members participate in co-design activities • 25 persons have joined project Telegram channel	No target cities mentioned	Global	Co-design citizen observatories for the EOS-Cloud	Citizen observatories, DIY initiatives, face-to-face workshops, online interactions and testing the services among all end-users involved	6 co-designe Events	Deep machine learning, automatic video recognition, advanced mobile app interfaces, and other cutting-edge technologies		Ten technological services to improve citizen science platforms,	A wide range of stakeholders in society, government, industry, academia, agencies, and research	Facilitate open science and citizen science initiatives, make it easier for citizen science platforms to share data using improved networks in a user-friendly way	Citizen observatories services	Local, city, regional, national, global	Not addressed in particular. The project outputs have potential to contribute to SDGs 3, 6, 11, 13, 14, 15	The quality of data, as well as maintaining the citizen observatories used to collect this data	None given	Citizen observatories, open science, citizen science, European Open Science Cloud	NEANIAS, INODE, CS3MESH4EOSC, TRIPLE
13	CROWD4SDG	https://cordis.europa.eu/project/id/872944	Crowd 4 SDG |	2020-2023	RIA	UNIVERSITE DE GENEVE, Switzerland (Uni)	Unis, national, regional and international institues (UNITAR)	To analyse how citizen science (CS) can be used to measure progresses to achieve the SDGs	Monitor the impacts of extreme climate events and strengthen the resilience of communities within the framework of climate-related disasters (subject areas: CC, DRR, WRM,CS, IT)	General public, younger age groups(16-26yrs)targeted in GEAR cycle 0	Not provided	No target cities mentioned	Swizerland, Spain, Italy, France,	Primarily contributory/crowdsourcing	Citizen cyber lab/ virtual citizen platforms	18 projects in Gear 1 and 14 projects in Gear cycle 2 selcted and the winners received training on CS tool development and deployment	Open Science and innovation, AI and ML, Assessment of citizen interaction and impact assessment	CS tools development for different themes and their assessment (HCI, relevance, quality, interactions etc.)	Datasets and software via OPENAIRE, 7 peer review articles, 5 conference proceesdings, 3 book chapters, 1 website, promotional videos etc.	• Citizens • researchers • policy makers(UN, EU, govt) • private sectors, innovation incubators and makers space	Showcased different applications of artificial intelligence and machine learning to enhance CS and explore the use of social media and other non-traditional data sources for effective monitoring of SDGs by citizens	Mainly different CS tools for monitoring water and flood reated issues in cities (water quality and quantity, flood mapping, flood loss estimation),	Can be used locally and scaled up to other scales	The CS projects developed in the three GEAR cycles of Crowd4SDG primarily aimed Climate Action (SDG 13), but also explored and additional SDG with SDG 13: sustainable cities (SDG 11) in Y1, women empowerment (SDG 5) in Y2, and human rights (SDG 16) in Y3.	None given	None given	Citizen science, climate change, SDGs, artificial intelligence, machine learning, social media	CitieS-Health, EnvironCitizen, REINFORCE, EU-Citizen.Science, WeCount, ACTION, CoACT, MICS
14	CS-SDG	https://cordis.europa.eu/project/id/101000014	https://www.cs-sdg-conference.berlin/en	2020-2021	CSA	Museum für Naturkunde Berlin (public sector)	Not consoritum members.	To organise a conference entitled 'A citizen science decade (2020-2030) in support to the sustainable development goals' to showcase citizen science initiatives	Comprised 19 sessions separated into three overarching themes in line with the objectives of the conference: “Addressing global challenges”, “Concepts and methodologies for the SDGs”, and “Policies, platforms and networks to achieve the SDGs”.	Policymakers and citizen science project leaders	Not provided	No target cities mentioned	Global	Contributory and collaborative	Citizen sceince festival	1	Organize conference entitled ' A citizen science decade (2020-2030) in support to the SDGs'.	Research communication and dissemination	Conferences summary and evluation, and a peer reviewed article	• Citizens • researchers • policy makers(UN, EU, govt)	One of the main conference outcomes was to formulate a Declaration including policy recommendations to define the roles, competencies and concrete potentials of citizen science to advance the SDGs and focused on the future of citizen science and its implementation in future funding programmes. The Declaration titled “Our world – our goals: citizen science for the Sustainable Development Goals” (h…	To showcase citizen science initiative in support to the sustainable development goals	Local to international	Mentioned SDGs in general.	None given	A focus on the promotion or creation of interfaces, for example, between projects and UN databases. Citizen science projects, some of which operate with little funding, should not be overburdened with inflated expectations as a means of implementing the SDGs.	Citizen science, SDGs	Not identified
15	DECODE	https://cordis.europa.eu/project/id/732546	https://decodeproject.eu	2016-2019	RIA	Institut Municipal d'Informatica de Barcelona (IMI) (public sector)	Research institutes, universities, public sectors, SMEs, industries, etc.	DECODE provides tools that put individuals in control of whether they keep their personal information private or share it for the public good.	Digital economy, IoT,digital democracy, citizen sensing	General public	Not provided	2	4 integrated pilots in Barecelona and Amsterdam	Primarily contributory/crowdsourcing	Digital platforms	4 pilots with the active involvement of social entrepreneurs, hackers and makers	Digital democracy, IoT, enviornmental sensing, DECODE platform with several microservices	Collecting and sharing CS data, ethical locally owned social netowrk	Data commons in 2 cities, 6 peer-review articles, 3 book chapters, 2 conf proceedings,13 pilots/prototypes	Researchers, civil society, businesses, and policy makers	Developers, social entrepreneurs, crypto experts should be able to plug into the DECODE platforms; DECODE App, platofrm and microservices aims to provide data sovergienty to ctizens.	DECODE expereimented to develop practical alternatives to show the wider social value that comes with individuals being given the power to take control of their personal data and given the means to share their data differently. DECODE piloted a data-centric digital economy where data that is generated and gathered by citizens, the Internet of Things (IoT), and sensor networks is available for bro…	Local/city scale	Not mentioned but more towards SDG 9.	None given	None given	Civil society, software development, governance, cryptography, operating system	FI-NEXT, FI-GLOBAL, frontierCities2, IMPACT GROWTH
16	DITOs	https://cordis.europa.eu/project/id/709443	http://www.togetherscience.eu	2016-2019	CSA	University College London, UK (Uni)	Policy bodies (European Citizen Science Association, DE), SMEs , Universities, Science galleries and public spaces and NGOs	To represent a step change in European public engagement with science and innovationat by elevating public engagement with science across Europe from passive engagement with the process of developing science to an active one.	Biodesign (the use of living things such as bacteria or plants in designing products or art) and Environmental sustainability, public engagement and capacity building, policy engagement for RRI.	General public, younger age groups(16-26yrs)targeted in GEAR cycle 0	Not provided	No target cities mentioned	17 stops at community centres, small towns, public festivals and museums of europe	All, has its own engagement model with 7 levels.the escalator model of engagement contends that people’s engagement with science can increase or decrease over time, depending on their life stage, resources, capabilities, knowledge and interests.	DITOs was organised into four themes; ‘environmental sustainability (ES)’ and ‘biodesign (BD)’ which run in parallel, and which intersected with another set of parallel themes, namely, ‘public engagement and capacity building’ and ‘policy engagement for RRI’. BD focused on aspects of biotechnology and DIY Bio, while ES included citizen science activities in ecology, biodiversity observations, and…	Delivered 829 public events over 3 years, achieving over half a million face-to-face interactions and a further 3 300 000 online	Do It Yourself (DIY) science, citizen science at various levels,RRI	See type of public engagement	20 public reports, Communication and dissemination channels, tools and materials were produced(multi-lingual), socail medial channels, DIY science postcards, DITOs innovation hubs	Citizens: improve the public’s awareness of science and RRI, participation in science and CS,visibility of science and citizen science , increased scientific knowledge and literacy; , policy makers: improve policymakers’ awareness of public engagement with science and citizen sciencepolicy support to guide agencies to set up schemes that take into account different levels of engagement;help ensur…	New direction in public engagement models and its application for science and innovation, e.g.use of sceince buses, making 17 stops at community centres, small towns, public festivals and museums haivng participatory workshops to make yogurts and suncream. Another success was BioBlitz, part of the City Nature Challenge, where people assembled at specific locations and used the iNaturalist app to …	Too often, science public communication programmes are didactic in nature.Citizen Science empowers citizens in exploring, measuring and experimenting with the world around them. Citizens have a major role to play in addressing the challenges to a sustainable future. It is by 'doing science together' that we combine our resources and expertise to raise awareness, build capacity, and innovative las…	More likely to be europe	Not mentioned but worked towards SDG 4, 9 and 10	None given	None given	DITOs, engagement, citizen science, society, biodiversity, policy	BigPicnic
17	DivAirCity	https://cordis.europa.eu/project/id/101003799	https://divaircity.eu	2021-2025	IA	UNIVERSITAT POLITECNICA DE VALENCIA, Spain (Uni)	Research institutes, universities, public sectors, SMEs, industries, etc.	To define new urban services and models towards cultural-driven green cities	Urban nexus that combines people, places, peace, economic growth, climate robustness and its impact on Air quality and decarbonization.	General public	Not provided	5	Orvieto (IT), Castellon (SP), Potsdam (DE), Aarhus (DK) and Bucharest (RO)	Co-design	DivAirCity aims at creating different solutions: 5 Permanent Living Labs (PLL), 1 Diversity and Inclusion green city index (DIGCI), 5 Smart Cities Climate contracts (SCCo), 1 Community of Practice (CoP), 5 air pollution mitigation services, and 1 EU protocol for decarbonization diagnosis.	Not provided	Inclusive citizen science involving and targeting marginal social groups (with a focus on women, young and elderly people, LGBTQ+ communities, ethnical minorities, diverse able people, low income groups)	Big data to shape inclusive solutions, codesign inclusive solutions by involving particular social groups,NBS distributed governance,community finance and community owenership . See type of public engagement	Not available yet.	• Citizens • researchers • policy makers(UN, EU, govt) • private sectors, innovation incubators and makers space	Not available yet	Nature-based solutions	Local city scale	Within the scope of the Sustainable Development Goals, valuing diversity and social inclusion to achieve innovative, creative, culture- driven, green and carbon neutral urban society.	None given	None given	Pollution, smart cities, air pollution engineering	Upsurge, JUSTNature
18	D-NOSES	https://cordis.europa.eu/project/id/789315	https://dnoses.eu	2018-2021	CSA	FUNDACION IBERCIVIS, Spain NGO/non-profit	Research institutes, universities, public sectors, SMEs, industries, etc.	To empower citizens to become a driving force for change through RRI, citizen science and co-creation tools to map and measure the problem, and co-design solutions with key quadruple helix stakeholders	Odour pollution, Citizen scicnece, codesign, cocreation, Odour observatory,	General public	More than 1200	7 EU (Spain, Greece,Bulgeria, UK, Italy,Germany, Portugal) and 3 nonEU (Uganda, Chile) countries, cities mentioned are Barcelona, Porto, São João da Madeira, Sofia.	need to check for more, cocreation and codesign for sure	Crowdsource odour issues and co-create ad-hoc solutions	Citizen science interventions	10	RRI, citizen science and co-creation tools to become drivers of change	A new methodology based on citizen science to improve environmental odour management	• The International Odour Observatory (OO) has been created and launched with the aim of providing access to odour pollution information to a variety of stakeholders • The main project tool, the citizen science App OdourCollect, has been improved to collaboratively report and map odour observations • DIY Guidelines for project replicability • scientific guidelines for policy making • The Green Pa…	Citizens, policy makers, CSOs, NGOs, local public authorities, odour emitting industries and academia	• Impact at environmental and social levels within the 10 pilot sites • Improving social cohesion within the communities. • A better understanding of the odour issue and linked to industrial operations to improve the odour problems.	Co-design citizen science interventions across 10 European and non-European countries, where citizens will use innovative mapping tools to crowdsource odour issues and co-create ad-hoc solutions with CSOs, NGOs, local public authorities, odour emitting industries and academia	City scale	Not mentioned, but worked towards SDG6, 11, 12	None given	None given	D-NOSES, citizen science, odour, pollution, smells, waste, crowdsource, geoposition	OMNISCIENTIS
19	DoReMi-RO	https://cordis.europa.eu/project/id/954638	None	2020-2021	CSA	Univesity (UNIVERSITATEA ALEXANDRU IOAN CUZA DIN IASI), Iasi, Romania	Universities and research institutes	To combine the European Researchers’ Night event in Romania with the 2020 International Year of Sound, in order to emphasize both research activities and technological development mixed with sounds and music	This is more of an outreach event. The aim of the citizen science project is to use participants' smartphones to map the magnetic field of Romania	General public	Not provided	More than 15	Romania only. Cities include Baia Mare, Brasov, Bucharest, Cluj, Constanta, Craiova, Iași, Pitesti, Timișoara, Sibiu and Suceava	Contributory	European Researchers Night events. All held online because of the pandemic.	Unclear	More of an outreach event to raise the profile of science and researchers and encourage people to consider science careers	Participants submit data through mobile phones	For the whole project, overall number of persons reached, in the context of all dissemination and communication activities: 396 000 Overall number of attendees: 13 000 (views & likes)	Unclear	Impacts are more those around engaging people with science and raising the profile of science. These are discussed as goals of the project but no evidence is provided in terms of realised benefits (beyond the number of people reached)	None	None	Possibly 4 (education); 8 (work)	Challenges with engagement - Events had to moved online because of the pandemic but this meant people in rural as well as urban areas could be reached			EPSN2021, NOCMOC, G9NIGHT, NET2021
20	FF2020	https://cordis.europa.eu/project/id/955366	None	2020-2021	CSA	Vetenskap & Allmanhet (non-profit), Stockholm, Sweden	No consortium partners but 12 subcontracted organisations including universities, science centres, a science park, a municipality and a research centre	ForskarFredag 2020 will connect local events in around 30 cities and towns across Sweden, aiming to bring the general public, in particular children and young people, in dialogue with researchers through interactive activities	Food waste	Focus on youth (12-19)	Evaluation of FF2020 showed that activities were attended by people in 54% of the municipalities in Sweden and over 21,800 people in total.	27	Sweden	Contributory	Science festival, part of European Researchers Night	120 online activities (for the whole event, not just related to the citizen science activity)	The 2020 citizen science project, the Food Waste Experiment invited school pupils to test a new way to reduce food waste in Swedish schools, whereby they learnt how their food choices and food waste affect the climate and took photos of the plates before and after lunch, which they uploaded to an app. The mass experiment was run as part of the Awareness campaign in the run up to and during Forska…	Participants submit data through mobile phones	No results of the citizen science project provided	Unclear	Citizen science project aimed to reduce food waste in Swedish schools	No information given	No information given	12.3 and possibly 4 (education) and 8 (work)	None given	None given	Researchers' night, public, cities, citizen science	ReCoN-nect, Montenight2021, EPSN2021
21	FoodE	https://cordis.europa.eu/project/id/862663	https://foode.eu	2020-2024	IA	ALMA MATER STUDIORUM - UNIVERSITA DI BOLOGNA, Italy	Universities, research institutes, public bodies, SMEs, other	Objective of FoodE is to accelerate the growth of citizen-led City/Region food systems (CRFS) by bringing local initiatives across Europe together, as well as co-developing and disseminating a range of tools - co-designed with academia, citizens, and food system start-ups - to ensure that the most up-to-date cross-sectorial knowledge is applied.	Development of citizen-led city region food systems to foster food security and nutrition, economic development and sustainable natural resource management	Academia, citizens, and food system start-ups	No target cities mentioned	12	Naples, Bologna, Sabadell, Tenerife, Amsterdam, Lansingerland, Berlin, Oslo, Longyearbyen, Romainville, Iasi, Ljubljana	Co-developing and disseminating new tools to promote and bolster citizen-driven food systems	Unclear	Not provided	Citizen Science and Responsible Research and Innovation principles	Aggregate the most sustainable models of city/region food systems	• Define an operational methodology for the assessment of CRFS. • Promote cross-pollination between European CRFS. • Contribute to increase access to affordable, safe and nutritious food. • Create a tool mobilising CRFS stakeholders in sustainability assessment. • Upscale the output to other EU cities.	Academia, citizens, and food system start-ups, public authorities, and non-profit organisations	The project as a whole "is expected to have impacts on job creation and income generation, strengthening the role of local communities in enhancing the sustainability of the food system, as well as identifying potential win-win relations between the different actors of the food chain. Moreover, the FoodE outcomes are expected to drive several practical applications and recommendations for uptake …	Promoting urban-rural governance to transform food systems	City, regional	Yes, addressed in the project description. The project outputs contribute to SDG2, 3, 11, 12	Aggregate the most sustainable models of CRFS and enable co-creation of innovative pilot experiences, fostering the health and wellbeing of European citizens	None given	Food systems, food security, sustainable agriculture	FoodSHIFT
22	Ground Truth 2.0	https://cordis.europa.eu/project/id/689744	https://gt20.eu	2016-2019	IA	STICHTING IHE DELFT INSTITUTE FOR WATER EDUCATION (Research Institute), Netherlands	Private for profit, research institues, universities, other	The overall objectives of Ground Truth 2.0 are to implement sustainable citizen observatories for the demonstration of their societal and economic benefits, and the global market uptake of the Ground Truth 2.0 concept and enabling technologies. The overall objectives of Ground Truth 2.0 are to co-design and implement citizen observatories that are helpful for (local) stakeholders in achieving sus…	Biodiversity, water quality and availability, air quality, noise, heat	Citizens, scientists and policymakers	Not given (although there may be targets or final numbers for the individual COs)	6 COs in Europe and Africa (but some are rural)	Stockholm (and surrounding region, Sweden); Mechelen (Belgium), also Catalonia and Netherlands but not sure how much of a city focus there is for these.	Co-design of citizen observatories plus different levels of citizen engagement within the 6 observatories themselves	Citizen observatories (co-designed)	Unclear	The methodology for establishing sustainable, demand-driven COs that was developed, validated and extended beyond the current state of the art in the field of citizen observatories and citizen science by providing a holistic and comprehensive approach to the social, technological and economic aspects of developing such innovative initiatives.		Explotation roadmap Guidelines for COs and future recommendations Validation and socio-economic impacts report Report on incentives and barriers for COs 9 conference proceedings 4 peer reviewed papers	Citizens, ndustry, SME, NGO, government, research and academia	A comprehensive impact assessment procedure was developed and implemented to trace social, institutional, economic and environmental changes triggered by the six observatories. Overall, Ground Truth 2.0 had aimed to Produce major impacts in two dimensions, namely (1) the demonstration of societal and economic benefits of citizen observatories and (2) their global uptake. In all its demonstration …	Ground Truth 2.0 aligned its efforts for building a Land User Mapper with prototypes of project-external parties in order to (eventually) generate a robust Global Land Use Mapper, especially for areas where either OSM data is scarce or remote sensing acquisition is hampered by frequent cloud cover. The Ground Truth 2.0 homepage serves as a prominent place for the unique GT2.0 approach, the Demo C…	For the project overall, the impact is intended to be global in terms of developing a network of sustainable COs but the impacts from individual COs may differ in scale		None given	None given	Ground Truth 2.0, citizen observatories, citizen observatory, water, environmental monitoring, natural resources, irrigation	GEOSS, INSPIRE
23	HOOP	https://cordis.europa.eu/project/id/101000836	https://hoopproject.eu	2020-2024	IA	ASOCIACION EMPRESARIAL CENTRO TECNOLOGICO DE LA ENERGIA Y DEL MEDIO AMBIENTE DE LA REGION DE MURCIA (Research Institution), Spain	Research insitutes, private for profits, other, universities, public bodies,	The HOOP Project will help to unlock bio-based investments and deploy local bio economies in Europe through a systemic and cross-cutting approach. It will offer Project Development Assistance (PDA) to a group of 8 lighthouse cities and city clusters - to build the technical, economic, financial and legal expertise needed to develop concrete investments to valorise OFMSW (Organic Fraction of Munic…	Bioeconomy, circular economy, food waste, sold waste management, waste water management	Unclear	Not provided	8 core cities and 26 additional cities	Spain, Greece, Netherlands, Belgium, Portugal, Germany, Italy, Finland, Norway, Czech Republic	Co-design	Unclear	Unclear	It will offer Project Development Assistance (PDA) to a group of 8 lighthouse cities and city clusters - to build the technical, economic, financial and legal expertise needed to develop concrete investments to valorise OFMSW (Organic Fraction of Municipal Solid Waste) or UWWS (Urban Wastewater Sludge) with the aim of obtaining safe and sustainable bio-based products. Each PDA will contain detail…		Not available yet.	Citizens, waste management companies, city authorities, scientists, business sectors	For citizen science elements of the project, "behavioural change and acceptability of biowaste-based products, as well as food waste prevention." Overall the project will "help to unlock bio-based investments and deploy local bio economies"	Aims to "valorise OFMSW (Organic Fraction of Municipal Solid Waste) or UWWS (Urban Wastewater Sludge) with the aim of obtaining safe and sustainable bio-based products"	City	Not named	None given	None given	None given	Not identified
24	SOCIO-BEE	https://cordis.europa.eu/project/id/101037648	https://socio-bee.eu	2021-2024	IA	ETHNIKO KENTRO EREVNAS KAI TECHNOLOGIKIS ANAPTYXIS (Research Institute), Greece	SMEs, universities, research institutes, public bodies, other	EU-funded SOCIO-BEE will study the facilitation of structures to increase citizen engagement and awareness of climate change through experimentation and monitoring of the environment. The project aims to develop low-cost technological innovations and instruments that will tangibly contribute to the overall pro-climate campaign, with primary focus on improving air-quality in urban areas.	Climate change	Unclear	Not provided	3 pilot sites	Ancona (Italy), Marousi (Greece) and Zaragoza	Unclear but likely to have a strong contributory element given the project objective	Unclear	Unclear	Development of new monitoring technologies	Data and knowledge related to cities socio-environmental observations and behavioral change to reduce air pollution	Not available yet.	Business, citizens and society	Key aim is to change individual behaviour relating to climate change	Development of new monitoring technologies to engage citizens to encourage behaviour change	City	SDG13	None given	None given	None given	CompAIR, GreenSCENT, I-CHANGE, PSLifestyle, AURORA, ECF4CLIM
25	SOLUTIONSplus	https://cordis.europa.eu/project/id/875041	http://www.solutionsplus.eu	2020-2023	IA	URBAN ELECTRIC MOBILITY INITIATIVE (UEMI) GGMBH (Research Insititute), Germany	Public bodies, private for profits, research institutes, other, universities, SMEs	The project SOLUTIONSplus aims to set up a global platform for shared, public and commercial e-mobility solutions, and to kick start the transition towards low-carbon urban mobility. The project work-plan encompasses city level demonstrations to test different types of innovative and integrated e-mobility solutions, vehicle and user-level demonstrations complemented by scaling up and replication …	Low carbon transport transitions	Unclear	Not provided	10 demonstration cities globally, two of these are in Europe	Hanoi (Vietnam), Pasig (Philippines), Lalitpur/Kathmandu (Nepal), Nanjing (China), Kigali (Rwanda), Dar es Salaam (Tanzania), Quito (Ecuador), Montevideo (Uruguay), Madrid (Spain) and Hamburg (Germany)	Collaborative "Thus cost effective and easy to use measuring devices for air quality and noise will be installed in key locations in each city allowing participatory data collection of the impact of demonstration activities"	Living Labs	Unclear	Living Labs	The state-of-the-art on urban e-mobility	As yet reports and 1 peer reviewed paper. Plan to develop global platform to share learning	Public authorities and SMEs, business/industry, citizens	The focus for the project is on shaping energy use, providing access for all, creating business opportunities and developing concepts that can make a direct contribution to a low-carbon development through e-mobility. The emphasis on shared and public transport fleets of the project will also help address, among other things, urban congestion, access to jobs and services, and influence land use. …	e-Mobility solutions	City-scale interventions but global platform	None named, but expected to contributed to 9, 11, 13	None given	None given	None given	Not identified
26	SPARCs	https://cordis.europa.eu/project/id/864242	https://sparcs.info	2019-2024	IA	VTT Technical Research Centre of Finland Ltd, a state owned research organization	Public bodies, SMEs, research organizations, universities, other (NGO)	To demonstrates and validates technically and socio-economically viable and replicable, innovative solutions for rolling out smart, integrated positive energy systems for the transition to a citizen centred zero carbon & resource efficient economy	Energy, zero carbon and resource efficient economy	Citizens, local communities, industries and authorities	Not provided	7	Espoo (FI), Leipzig (DE), Reykjavik (IS), Maia (PT), Lviv (UA), Kifissia (EL) and Kladno (CZ)	Co-creation	Unclear	Not provided	Systemic integration of technologies on-going, Context-Aware Energy Behavioural and Demand Flexibility Profiling, ICT Platforms for PEDs, Collective Urban Self-Consumption	It is a innovation action.	• Integrated urban planning and management - policy and regulation • Positive energy building blocks and district • Context-aware energy behavioural and demand flexibility profiling • ICT platforms for PEDs to deliver open data and services • Community demand management systems for collective urban self-consumption with bottom-up citizen engagement and empowerment • The sustainability metrics: de…	Citizens, local communities, industries and authorities	The impacts of SPARCS span economic growth, improved quality of life, and environmental benefits towards the EC policy framework for climate and energy, the SET plan and UN Sustainable Development goals.	Solutions eligible for banking support based on pioneering business models, tailored on interactions between the citizen, building and urban energy systems, as well as effective governance model to facilitate the transformation process.	City	Yes, mentioned in the objectives. The project outputs contribute to SDG3, 7, 11, 12	None given	None given	Smart cities, Sustainable energy, zero carbon communities	ATELIER, RESPONSE, POCITYF, CityChange, MAKING-CITY
27	STARS4ALL	https://cordis.europa.eu/project/id/688135	https://stars4all.eu	2016-2018	RIA	The Technical University of Madrid, a public university, located in Madrid, Spain	Research organizations, universities, public bodies, other (Network, association)	To create an Light Pollution Initiative (LPI) incubation platform that will allow generating (and maintaining) customizable on-demand domain-focused LPIs (e.g. a light pollution working group in Brussels)	Light pollution	Citizen in genernal	Not provided	No target cities mentioned	Africa, Australia, Europe, Latin America, New Zealand, and the United States	Analysis of the light images by citizen scientists	Light pollution initiatives	Not provided	Collective awareness, crowdfunding tool, data acquisition	The state of the art in the different domains of the STARS4ALL multidisciplinary consortium (ICT, Social Sciences, Economy, Astronomy, Biodiversity).	Hardware and ICT development, as well as open data production and acquisition	Citizens, businesses, and other organisations	• The project has established STARS4ALL foundation, focusing on astronomy and the certification of dark sky parks, providing a unified voice for light pollution researchers in dialogues with public authorities. • Potential impact on policy: scientists submitted a petition to the European Parliament supporting the need for a European policy regarding light pollution. On a smaller scale, one initia…	Collective awareness platform for promoting dark skies in Europe, and creating policy change.	Europe, global	Not mentioned directly, but worked towards SDG 3, 11, 12, 13, 14, 15	None given	None given	Light, pollution, light pollution, photometer, light pollution initiatives (LPIs), policy, policies, astronomy, lighting, data, grassroots	hackAIR, CAPTOR, ASSET, POWER
28	STEM4youth	https://cordis.europa.eu/project/id/710577	https://www.stem4youth.eu	2016-2018	RIA	The Warsaw University of Technology, Warsaw, Poland .	Research institutes, universities, SME, other (foundation)	To produce a comprehensive, multidisciplinary series of courses presenting key STEM discipline challenges to support young people, primarily high school students aged 14-19, formal and informal education.	Mathematics, Physics, Astronomy, Chemistry, Engineering and Medicine.	High school students aged 14-19	14 students teams participanted a competition	No target cities mentioned	Across Europe	Contributory and collaborative	Online games, educational toolkits, storytelling and experiments	Not provided	Mathematics, Physics, Astronomy, Chemistry, Engineering and Medicine	Knowledge of STEM disciplines and job characteristics associated with these disciplines	An educational platform for content sharing and for student and teacher support.	Young people, scientists	Helps young people to take conscious decisions on their interests, field of education and finally - their career paths.	A comprehensive, multidisciplinary series of courses	Europe	Not mentioned directly, but worked towards SDG4, 8	Make science education and scientific careers attractive to young people	None given	STEM, students, education, science, technology, teachers, career	STIMEY, UMI-Sci-Ed, EDU-ARCTIC, Marine Mammals
29	TORCH	https://cordis.europa.eu/project/id/101017229	https://www.charm-eu.eu/torch	2021-2023	CSA	The University of Barcelona, a public university located in the city of Barcelona, Catalonia in Spain.	Universities	To develope a common research and innovation agenda focused on accelerating processes of institutional change, enhancing gender equality in research and innovation policies and supporting citizen science via three main thematic areas: food, water, life and health; biodiversity, environment, climate change; (in)equality, economic growth and governance.	Food, water, life and health; biodiversity, environment, climate change; (in)equality, economic growth and governance	Citizens, civil society and public/cities authorities	Not provided	No target cities mentioned	Europe	No actual engagement	No public engagement initiative applied	Not provided	Responsible research and innovation, Open Science principles, transdisciplinary and intercultural approaches	It is a coordination and support action.	A common and transformative agenda for responsible research and innovation	Universtities	Accelerating processes of institutional change, enhancing gender equality in research and innovation policies and supporting citizen science via three main thematic areas: food, water, life and health; biodiversity, environment, climate change; (in)equality, economic growth and governance.	None	Local	Yes, SDGs was addressed in realtion to three thematic topics, i.e., water, food and health	None given	None given	RRI, citizen science, open science, transdisciplinary, intercultural approach	FIT FORTHEM, SMART-ER, CIVICA RESEARCH, UNITE
30	Waste4Think	https://cordis.europa.eu/project/id/688995	https://waste4think.eu	2016-2020	IA	Fundación Deusto (FD), a research organization, Bilbao, Spain	Public agencies and administrations, research centres and universities, SMEs, LEs, cluster and NGO	To move forward the current waste management practices into a circular economy motto, demonstrating the value of integrating and validating a set of 20 eco-innovative solutions that cover all the waste value chain.	Waste management, mainly biowaste and nappies	Citizens, industry sectors, business sectors, tourists	Not provided	4	Halandri (Greece), Zamudio (Spain), Seveso (Italy) and Cascais (Portugal)	Co-creation of novel solutions (domestic, catering/hotel and industrial)	Waste prevention initiatives, social awareness campaigns, education actions in schools, promotion of zero-waste events, social actions based on games and apps	Not provided	Integrated advanced waste management systems, eco-innovative solutions	WESTE (Waste Environmental, Social, Technical and Economic data assessment) methodology to compare the sustainability levels of waste management services and also monitor implemented actions.	A open-source platform FIWARE to collect and manage all the information around waste management provided by different Internet of Things and Internet of humans Humans systems.	Municipalities, waste management companies	• 15% increase in waste sorting • 11% saving of management costs • 47% reduction of GHG emissions • The experience gained, and the synergies among the partners describe the best possible scenario to launch new governance and business models	• Implementation of economic instruments and social actions • Optimisation of waste collection to reduce the environmental impact of collection works. • Defining an advanced waste collection system and exploitation of biowaste	City	Not mentioned in particular. The project outputs can contribute to SDGs 3, 6, 7, 9, 11, 12, 13	The challenge is to improve the waste management not only in economic or operational terms but also considering the environmental and social impacts.	None given	Waste, waste management, eco-innovative solutions, valorisation, circular economy, biowaste, circular use of resources, greenhouse gas emissions, WESTE, FIWARE, IoT, Internet of humans, citizens	DECISIVE, FORCE, URBANREC
31	WeCount	https://cordis.europa.eu/project/id/872743	https://www.we-count.net	2019-2021	RIA	Transport & Mobility Leuven NV (TML), a consulting organization from Leuven, Belgium	SME, universities, NGOs	To empower citizens to take a leading role in the production of data, evidence and knowledge around mobility in their own neighbourhoods, and at street level	Mobility and environmental pollution	Citizen in genernal	Hundreds of citizens	5	Madrid (Spain), Ljubljana (Slovenia), Dublin (Ireland), Cardiff (UK) and Leuven (Belgium)	Support the evidence gathering, co-create and use innovative low cost, automated, road traffic counting sensors; co-design informed solutions to tackle a variety of road transport challenges	Face-to-face citizen engagement activities, online/hybrid format	Not provided	Participatory citizen science, co-create and use innovative low cost, automated, road traffic counting sensors, multi-stakeholder engagement mechanisms	Quantify local road transport (cars, large vehicles, active travel modes and speed), produce scientific knowledge in the field of mobility and environmental pollution	· The project has engaged directly with more than 1,000 citizens and stakeholders through workshops, seminars, mutual learning and science-policy dialogue workshops, as stipulated in the bid. · A total of 368 citizen scientists from WeCount case studies directly engaged with the project over its 24-month duration. · An estimated 230,000 people were engaged indirectly through social media and the …	Local and regional authorities and cities (local policy makers and the transport policy research community), citizens, researchers	• Educating citizen about the field of traffic management based on traffic counting’s • Data is relevant for monitoring the impact of the COVID-19 pandemic on traffic volumes • Lead policymakers to make better informed decisions about traffic planning and management	Citizens observing urban transport	City	Not mentioned in particular. The project outputs can contribute to SDGs 3, 11, 13	• Challenges of adapting citizen science methodology to an online setting, necessary due to the constraints brought on by the COVID-19 pandemic •How the lessons learned can better inform future urban policy	None given	Traffic, urban, count, citizen, science, sensor, policy, data, evidence	CitieS-Health, EnviroCitizen, CROWD4SDG, CSI-COP, REINFORCE, ACTION, CoAct, MICS
32	WeObserve	https://cordis.europa.eu/project/id/776740	https://www.weobserve.eu	2017-2021	CSA	IIASA, an independent international research institute located in Laxenburg, near Vienna, in Austria.	Research institutes, university, public sector	To create a sustainable ecosystem of citizen observatories that can systematically address the identified challenges (awareness, acceptatiblity and sustainability) and help move citizen science into the mainstream	Citizen observatories, environmental monitoring	Citizen in genernal	• WeObserve MOOC (2100+ learners from 107 countries, 1000+ downloads tools) • WeObserve CoPs (240+ participants in 40+ countries) • the Open Data Challenge (44 registrations, 22+ countries across the globe) • the CS challenges of the INSPIRE Hackathon (35 participants, 22 countries)	No target cities mentioned	Global	Co-designing the knowledge base on the value of citizen observatories for governance and data interoperability	Massive open online course, capacity development roadshows	Not provided	Communities of practice, Massive open online course, capacity development roadshows, hackathons, open data exploitation challenge, online marketplace	The project is a coordination and support action	• Lessons learnt and recommendations: CO Landscape Reports, Academic papers, Interoperability Experiment report, WeObserve innovation and research Roadmap, Policy Briefs • Synthesis of approaches, tools and open data/software: MOOC, Toolkit, Cookbook, Knowledge base, Github repository	Public authorities and SMEs, business, researchers, citizens	• Improved coordination between existing environmental citizen observatories and relevant activities at regional, European and international levels • Expanded the geographical coverage and use of environmental citizen observatories • Supported the wider dissemination and uptake of data management and preservation strategies • To increase opportunities for SMEs and business through organised activ…	Create an ecosystem of citizen observatories for environmental monitoring	Local, city, regional, national, global	Yes, mentioned SDGs in general. The project outputs have potential to forge links with GEOSS, Copernicus and the UN SDG framework, and contribute to SDGs 3, 6, 11, 13, 14, 15	None given	None given	Citizen observatories, environmental monitoring, citizen engagement, governance,	Ground Truth 2.0 GROW, LandSense, Scent
33	hackAIR	https://cordis.europa.eu/project/id/688363	https://www.hackair.eu	2016-2018	RIA	Draxis, a SME located in Thessaloniki, Greece	SMEs, research organizations, NGO, university	To develop and pilot test an open platform that will enable communities of citizens to easily set up air quality monitoring networks and engage their members in measuring and publishing outdoor air pollution levels, leveraging the power of online social networks, mobile and open hardware technologies, and engagement strategies.	Air quality	Citizen in general, school students, researchers, patients who suffer athma and allegy disease	13 000 people accessed the hackAIR platform to be informed about the quality of the air they breathe, around 800 citizens began measuring air pollution with their own DIY hackAIR sensors, while 1 400 citizens contributed to the hackAIR community by uploading photos of the sky	More than 20 cities	Major cities in Germany and Norway	Contributory, collaborative and co-creation	Co-creation hackAIR sensors and app workshops	More than 20	RRI, collective awareness, DIY, ICT	Awareness raising and behaviour changing assessment	An online collective awarenss platform for outdoor air pollution	Public, research organizations, authorities	• Raise awareness on air quality, citizens can find information about the air quality in their neighbourhood. • Together with other members of their community, citizen can contribute to improving air quality data where they live. • Targeted behaviour change to reduce exposure to dangerous air pollution and improve air quality overall. • A better understanding of air pollution hotspots in cities i…	Collective awareness platform for outdoor air pollution	Local, city, national	Not addressed in particular. The project ooutputs contribute to SDGs 3, 11, 13	Maintaining citizens during the project period	None given	Air quality, air pollution, sensor, particulate, Nova SDS011 PM sensor, citizen science	POWER, SavingFood, CAPTOR
34	CITI-SENSE	https://cordis.europa.eu/project/id/308524	https://citi-sense.nilu.no	2012-2016	CP	NILU, a research organization, Olso, Norway	Research organizations, SMEs, NGO, universities, public bodies, other	To develop “citizens’ observatories” to empower citizens to contribute to and participate in environmental governance, to enable them to support and influence community and societal priorities and associated decision making.	Air quality, environmental quality in public space	Citizen in general, schools students, patients who suffer athma and allegy disease	More than 400	9	Barcelona (ES), Belgrade (RS), Edinburgh (UK), Haifa (IL), Ljubljana (SI), Oslo (NO), Ostrava (CZ), Vienna (A) and Vitoria-Gasteiz (ES)	Contributory, collaborative and co-creation	Co-creation cityair app workshops	24 citizen observatories	ICT, citizen observatories, air quality monitoring	Data assimilation and fusion, exposure assessment	Data and information, cityair app, new tools for citizen monitoring of the urban environment, including low-cost micro-sensors and data analysis tools	Public, research organizations, authorities, students	Citizen involvement in environmental decision-making, specifically motivation and barriers	Citizen observatories activities for air quality (outdoor and indoor), and environmental quality in public spaces	Local, city	Not addressed in particular. The project ooutputs contribute to SDGs 3, 11, 14	Maintaining citizens during the project period	None given	Citizen-based, air quality, Citizen Observatories, CITI-SENSE, environmental monitoring	WeSenseIt, OMNISCIENTIS, CitClops, CobWeb
35	COBWEB	https://cordis.europa.eu/project/id/308513	https://www.weobserve.eu	2012-2017	CP	THE UNIVERSITY OF EDINBURGH, Edinburgh, UK	Universities, public bodies, SMEs, other	To develop a citizens’ observatory framework, and then validate the work within the context of the UK National Spatial Data Infrastructure (SDI) and internationally, within the WNBR	Species distribution, flooding and land cover/use	Citizen in general	7 citizen groups active in the Dyfi Biosphere Reserve in mid-Wales	No target cities mentioned	mid-Wales	Co-Design	Co-design happens where “participants are invited to cooperate with designers, researchers and developers during an innovation process”	7	Citizen observatory, crowd-sourcing, environmental governance, data fusion	The state of the art in the creation and validation of data products from satellite data, biological monitoring and flooding.	A generic crowdsourcing infrastructure platform	Policymaers, scientists,	The amount of citizen sourced environmental data will continue to increase dramatically and clearly has the potential to be of use for policy formation and delivery in respect of environmental decision making.	A generic solution to the problem of automating data quality control, flexible and adaptable to many different scenarios, plus helped with the reuse of citizen science data.		Yes, mentioned SDGs in general. The project outputs have potential to contribute to SDGs 13	The problem of automating data quality control	None given	Environmental research, biosphere reserves, COBWEB, citizen observatory web, crowdsourcing	CITI-SENSE, WeSenseIt, OMNISCIENTIS, CitClops
36	WESENSEIT	https://cordis.europa.eu/project/id/308429	https://www.wesenseit.com	2012-2016	CP	THE UNIVERSITY OF SHEFFIELD, Sheffield, UK	SMEs, research organization, universities, public bodies	To develop a citizen-based observatory of water, which will allow citizens and communities to become active stakeholders in information capturing, evaluation and communication	Availability and quality of water and increase the likelihood of flooding	Citizen in general	Not provided	3	Doncaster (United Kingdom), Delft (the Netherlands) and Vicenza (Italy)	Contributory and collaborative	Participatory and opportunistic sensing	Not provided	Citizen observatory, crowd-sourcing, techniques to harness citizens' collective intelligence	* Sensing water variables via professional and citizens sensors; collecting data via participatory and opportunistic sensing (WP1) * Integrated Social and Physical Sensors Networks connecting the data collected in WP1; * Adaptive risk based models (WP3) * Methods for participatory decision support (WP4) * Infrastructure for citizen observatories (WP5) * Analysis of governance around citizen obser…	• Sensible heat flux for wireless sensor networks • Stream flow velocity from smartphone video clips • Integration of social feedback as model parameters • Various sensor interfaces and sensor nodes • Disdrometers – connected acoustic rain gauges • Urban umbrella rain gauge (prototype) • Citizen reporting • Wireless multi-sensor hydro-meteorological sensor stations • SmartCam for long-term water …	Emergency services and policymakers, citizens, researchers	• Facilitate citizens to contribute information about water-related phenomena, which can be fed into the governance process. • Enable decision makers to empathise with the public at large and reflect upon their preferences and values. • Create a more equal relationship while dealing with the major challenges of our time, such as climate change and energy use.	Solutions that involve an exchange of information and expertise from all participants and where the focus is on arriving at practical solutions with a clear vision and direction grounded in basic research	National, Europe	Not addressed in particular. The project ooutputs contribute to SDG3, 6,,11, 13	None given	None given	Water resources, citizen observatory of water, floods, droughts, water management	CITI-SENSE, CobWeb, OMNISCIENTIS, CitClops
37	OMNISCIENTIS	https://cordis.europa.eu/project/id/308427	http://omniscientis.eu	2012-2014	CP	SPACEBEL SA, a SME, Liege Angleur, Belgium	Research organizations, SMEs, universitites, other	Brings together state of the art technologies and open communication capabilities in order to mitigate odour annoyance. The project enables a feedback of citizens, enhance knowledge on odour measurement and management, aims to support harmonization of legislations at EU level and provide savings to industrials	Odour perception, discomfort and nuisance from industrial sites	Citizen in general	Not provided	No target cities mentioned	Belgium, France and/or Austria	Contributory and collaborative, citizens provided feedback on odour acceptability levels through smartphones.	Living lab	Not provided	Citizen observatory, technology innovative sensors	Assess how citizens are affected by bad smells in their communities	An Environmental Information System for Odour including E-noses and integrated measurement networks	Industry, farming, waste water plant, chemical plant, the citizens living in the neighbourhood, the authorities at various levels (City, Environmental Administration, legislative bodies, etc).				Not addressed in particular. The project ooutputs contribute to SDG3, 6, 11, 12, 13	None given	None given	Information system, odours, innovative sensors, dispersion modelling, e-nose sensors, citizen observations
38	CITCLOPS	https://cordis.europa.eu/project/id/308469	http://www.citclops.eu	2012-2015	CP	FUNDACIO EURECAT, a research organizaiton, Barcelona, Spain	Research organizations, SMEs, universitites	To develop systems to retrieve and use data on seawater colour, transparency and fluorescence, using low-cost sensors combined with contextual information (e.g. georeferencing) and a community-based Internet platform, taking into account existing experiences (e.g. Secchi Dip-In, Coastwatch Europe and Oil Reporter)	Coast and ocean optical monitoring	Citizen in general	Not provided	No target cities mentioned	Global	Contributory and collaborative, by using their mobile devices for collecting, processing and forwarding sensor data, citizens become actively involved in environmental monitoring		Not provided	Citizens' observatory	Monitor and assess the environmental status of water bodies (e.g., coast and ocean)		Local authorities and general public, scientists	Impact on both policy and research activities by supporting the implementation of EU directives. These include the Bathing Water Directive, which requires the public to receive appropriate and timely information on the results of monitored bathing water quality.	Citizens' observatory for coast and ocean optical monitoring	City, regional	Not addressed in particular. The project ooutputs contribute to SDG3, 6, 11, 12, 14, 15	None given	None given	Marine environment, water quality, citizens' observatory, optical monitoring, environmental monitoring	CITI-SENSE, COBWEB, WeSenseIt, OMNISCIENTIS
39	SCENT	https://cordis.europa.eu/project/id/688930	https://scent-project.eu	2016-2019	IA	INSTITUTE OF COMMUNICATION AND COMPUTER SYSTEMS, a research organization, Athina, Greence	Research organizations, SMEs, public body, other	To enable citizens to become the ‘eyes’ of the policy makers by monitoring land-cover/use changes in their everyday activities	Land cover/use changes	Citizen in general	500	No target cities mentioned	Kifisos Attica and Danube Delta	Contributory, via a competitive augmented reality game, called SCENT Explore, and an easy-to-use soil moisture monitoring app called SCENT Measure, to ensure that collecting data is fun for citizens	Pilot campaign, training of the participants in campaign	Not provided	Constellation of smart collaborative technologies and people-centric observation web	Numerical models for mapping land-cover changes to quantifiable impact on flood risks	• low-cost and portable data collection tools • an innovative crowd-sourcing platform • serious gaming applications for a large-scale image collection and semantic annotation • a powerful machine-learning based intelligence engine for image and text classification • an authoring tool for an easy customization by policy makers • numerical models for mapping land-cover changes to quantifiable impac…	Citizens, industries, SMEs, scientists, NGOs, policy makers/public bodies	• Lowered cost and extension of the in-situ component of the GEOSS and Copernicus initiatives • Better decision-making through the empowerment and active role of citizens and citizen’s associations in environmental monitoring • Enhanced implementation of governance and global policy objectives • Increased deployment and market uptake of innovative in-situ monitoring techniques • Increased Europea…	Easy-to-use, collaborative technologies that help citizens actively engage in environmental monitoring		Not addressed in particular. The project ooutputs contribute to SDG3,11,13,14,15	None given	None given	SCENT, environmental monitoring, citizen scientists, Earth Observation, Copernicus, climate change, augmented reality, flood modelling	GROW, LANDSENSE, Ground Truth 2.0
40	LANDSENSE	https://cordis.europa.eu/project/id/689812	https://landsense.eu	2016-2020	IA	IIASA, an independent international research institute located in Laxenburg, near Vienna, in Austria.	Research organizations, SMEs, universitites, others	To build a far reaching citizen observatory for Land Use and Land Cover (LULC) monitoring that will also function as a technology innovation marketplace.	Land Use and Land Cover (LULC) monitoring	Citizen in general	1500	No target cities mentioned	Vienna, Toulouse, Amsterdam, Indonesia, Serbia and Spain	Contributory, collaborative	Tools for discussion, online voting collaborative mapping, as well as events linked to various campaigns involving public consultation	Not provided	Citizen observatory, technology innovative maketplace	Integrating citizen-driven in-situ data collections with established authoritative and open access data sources	• LandSense Services (Campaigner, Change Detection, Quality Assurance, CropSupport) • Applications for in-situ data collection (City Oases, MijnPark, Paysages, Natura Alert, Picture Pile) • LandSense datasets (City Oases, MijnPark, Paysages, CropSupport, Natura Alert) • LandSense publications (Public deliverables, Scientific journal publications)	Citizens, scientists	• Increasing awareness of greenspaces through exploring and reporting on the urban environment • Fostering coupled EO-CS-based technologies to improve farming practices • Increased reporting of biodiversity threats in IBAs in Spain and Indonesia by citizens • Recognition by agencies involved in urban planning, agriculture and biodiversity monitoring of the benefits of citizen engagement and in th…	Low-cost/scalable solutions and innovative citizen-driven methods to improve EU environmental monitoring strategies	City and regional	Not addressed in particular. The project ooutputs contribute to SDG3,11,13,14,15	None given	None given	LANDSENSE, Earth Observation, environmental monitoring, Copernicus, citizen observatories, land use, BirdLife International, Important Bird and Biodiversity Areas, IBAs, Natura 2000, biodiversity	GROW, SCENT, Ground Truth 2.0
41	Grow Observatory	https://cordis.europa.eu/project/id/690199	https://growobservatory.org	2016-2019	IA	UNIVERSITY OF DUNDEE, Dundee City, UK	Research organizations, SMEs, universitites, public bodies, others	Create a sustainable citizen platform and community to generate, share and utilise information on land, soil and water resource at a resolution hitherto not previously considered	Land, soil, water resource	Primarily individual growers and small-scale farmers	20 500 small-scale plant growers and farmers	No target cities mentioned	Europe	Contributory, collaborative	‘Campaigns’ (coordinated sampling operations), online training, Massive Open Online Courses (MOOCs)	24 citizen communities	‘Campaigns’ (coordinated sampling operations)	• The deployment of a massive sensing network and the significant amount of open, quality-controlled data extends the in-situ segment of Copernicus and the Global Earth Observation System of Systems (GEOSS). • Average soil moisture calculated from all low-cost sensors in one satellite pixel results in much better accuracy than using the most representative or high-quality sensor (for both coarse …	A sustainable citizen platform and community to generate, share and utilise information on land, soil and water resource at a resolution not previously considered.	Farmer and food-growing communities, scientists	• Pioneered the use of Massive Open Online Courses (MOOCs) to scale rigorous citizen science in a CO. • Significant amount of open, quality-controlled data extended the in-situ segment of Copernicus and the Global Earth Observation System of Systems (GEOSS). • Enhanced the ground-truthing of satellite products • Enabled the Global Soil Partnership (GSP) to better achieve sustainable soil manageme…	Monitoring soil moisture, to improve the accuracy of satellite information. Farmers also benefit from long sought-after information on how water availability varies across their land over time. The project gives them access to online training on food production methods that preserve and regenerate soils.	Local	Not addressed in particular. The project ooutputs contribute to SDG13, 2, 12	None given	None given	GROW, plant grower, farmer, water, soil, monitoring, satellite, climate action, sensor	LANDSENSE, SCENT, Ground Truth 2.0
42	TeRRIFICA	https://cordis.europa.eu/project/id/824489	https://terrifica.eu	2019-2022	CSA	Wissenschaftsladen Bonn e.V., a non-profit organization working on a costcovering but not profit-orientated basis.	Research organization, universities, public bodies, other (NGOs)	To review the state of the art in climate change adjustment models, policies and strategies, examine approaches to climate action, climate change adaptation and and climate change mitigation in central, south, east and west Europe, in urban and rural areas as well as in EU and non-EU regions	Climate action, climate change adaptation and mitigation	Citizens, local authorities and experts	Six co-creation teams composed of representatives of different stakeholder groups were established and consulted and besides other outputs a content analysis of about 20 case studies to identify effective practices in community–academia research partnerships related to or adaptable for climate actionwas presented	6	A metropolitan area like Barcelona, in capital and major cities like Belgrade, Poznan and Minsk, in the agricultural region of Vechta and Cloppenburg, and rural regions like Brittany, Normandy and Pays de Loire with certain similarities in geography and climate (Spain-Serbia, Poland-Belarus, France-Germany)	Co-creation activities, involving citizens in agenda-setting processes corresponding to climate change challenges on the level of beneficiary institutions and regions	Applying living labs strategies, crowd-mapping and co-creation activities with feedback loops, develop and coordinate adaptation processes	Not provided	RRI, co-creative multi-stakeholder approaches, cross-disciplianry, Scientix	Customised guides and key performance indicators for climate change adjustment exercises.		Policy makers, civil society, science, municipalities, regional and national governance bodies, universities and mainly citizens and NGOs	Explore possibilities and build future visions of a climate landscape in 2030, exploit the implementability of actions suggested by various actors in the pilot cities and regions, provide recommendations, new procedures, tools and adapted methodologies that are appropriate to the different roles and objectives, consider the key policies of RRI as well as the UN Sustainable Development Goals. Deve…	Climate change mitigation approaches in Central– South, East – West, urban – rural, EU – non-EU settings.		Yes, addressed in the project description.	None given	None given	Air quality, air pollution, sensor, particulate, Nova SDS011 PM sensor, citizen science	RRI2SCALE, RIPEET,
43	COACT	https://cordis.europa.eu/project/id/873048	https://coactproject.eu	2022-2022	RIA	UNIVERSITAT DE BARCELONA, a public university, Barcelona, Spain	Universities, research organizations, others	To tackling social global concerns related to mental health care, youth employment, environmental justice and gender equality: by engaging vulnerable citizens acting as co-researchers	Youth Employment, Environmental Justice and Gender Equality	Vulnerable citizens, including persons with an experience of mental health and their families, young people not working nor studying or neighbours living in poor conditions in the highly contaminated Riachuelo basin	Almost 60 citizens in a vulnerable situation have been actively participating into research co-design	No target cities mentioned	Barcelona (Spain), Vienna (Austria), Berlin and eastern Europe, as well as Buenos Aires (Argentina)	Develop a general framework for Citizen Social Science as a participatory research co-designed and directly driven by citizen groups sharing a social concern		Not provided	Open Science and Open Data activism, Computational Social Science, Participatory Action Research, Citizen Science evaluation or Citizen-generated Data, transdisciplinary Citizen Social Science	Citizen Science evaluation or Citizen-generated Data will be incorporated to conceive a transdisciplinary Citizen Social Science that place vulnerable citizens at the center of Research and Innovation cycles, as co-designers and co-researchers	An Open Citizen Science toolkit, Open Source digital platforms, and Capacity Building activities to improve data and science literacy, including a PhD Summer School, will be delivered		• generate ground-breaking scientific knowledge that will be materialized in different formats: Open Access scientific papers co-written with co-researchers, conceptual Open Access papers explaining the CoAct framework and finally Open Tools that will allow the researchers to re-use and adapt CoAct methodologies. • more than 250 co-researchers in its R&I Actions, train them concerning data litera…	Co-designing citizen soical science for collective action	City	Yes, SDG on gender equality is addressed by the project.	None given	None given	Citizen-based, air quality, Citizen Observatories, CITI-SENSE, environmental monitoring	MICS, ACTION, WeCount, CROWD4SDG
44	MakingSense	https://cordis.europa.eu/project/id/688620	yeshttp://making-sense.eu	2015-2017	RIA	STICHTING WAAG SOCIETY, reseach organization , Amsterdam, Netherlands	Research institute, university, public sector, SME, industry, etc.	Engaging citizens in measuring air, water, soil and sound pollution in 3 Eu cities (barcellona, Prishtina and amsterdam) by using DiY sensor kits. develop a conceptual and methodological framework for participatory environmental maker practices in the form of a toolkit, showing how to provide citizens and communities with appropriate tools to enhance their everyday environmental awareness, to ena…	Air, water, soil and sound pollution	Adults and youngest	More than 2500	3	Barcelona (spain), pristina (kosovo), Amsterdam (the netherlands)	Collaborative	FabLab approach, workshops with citizens, measurement sessions, public events, meetup, digital bootcamps	Around 15 workshops with citizens, 1 meetup, 1 topical carcamp, 3 impact calibration sprints, 162 air pollution measurement sessions and 1 placement of diffusion tubes. 4 general assemblies wioth local communities and 1 digital bootcamp	FabLab approach. DiY sensing development and usage. communty empowerment. Interdiscipliary	different kind of pollution measurement, but the core of the research waht on how to effective egage citizens in CS activities for solving local needs and empowermnet them trougth the principles of open science and fabLab approach	MakingSense toolkit, two low cost sensors kits openly available on openAir in terms of design and code.17 deliverables, one video, datasets available on openair, at least one scientific pubblication.	Local communities, citizen scientists, researchers, polkicy makers	social, technoscientific, politicala dn envirormental. political impact particularly significative, this project is often cited as a best practice in this sense as it succeed in changing local regulation on noise pollution. see the impact assassement report.	Deepening our understanding on the processes enabling collective awareness of air, water, soil, sound pollution	City level	Not addressed explicitelly. The project outputs contribute to SDG3, 6, 11, 15	None given	None given	Environmental research, biosphere reserves, COBWEB, citizen observatory web, crowdsourcing	hackAIR, ASSET, CAPTOR, POWER
